# Supplementary material for: Evolutionarily Conserved Herpesviral Protein Interaction Networks
Source: PubMed Central journal article supplement (PMC2731838; doi:10.1371/journal.ppat.1000570), 2009-09-04

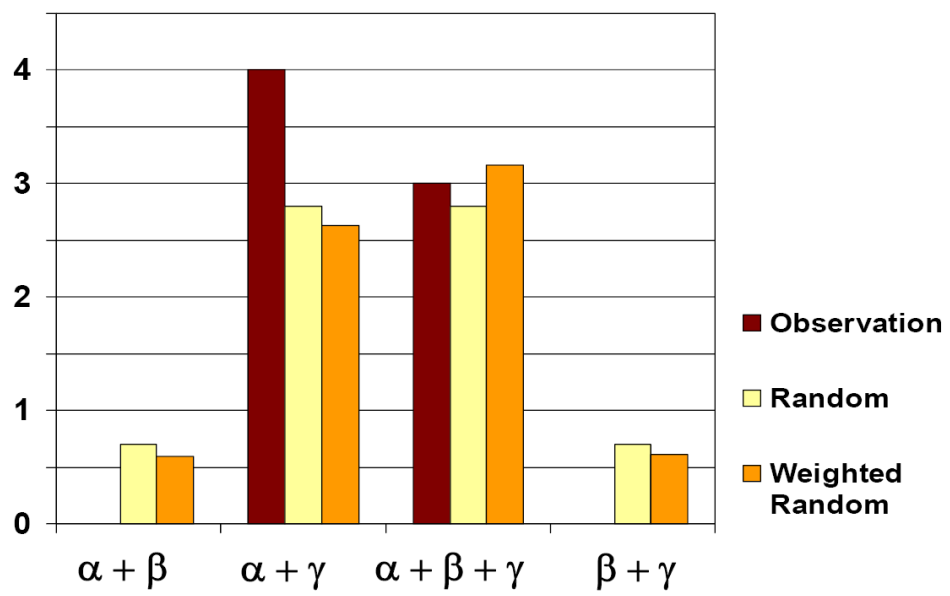

Supplement: ppat.1000570.s009.pdf [file ppat.1000570.s009.pdf]
