# Supplementary material for: Evolutionarily Conserved Herpesviral Protein Interaction Networks
Source: PubMed Central journal article supplement (PMC2731838; doi:10.1371/journal.ppat.1000570), 2009-09-04
Supplement: ppat.1000570.s015.pdf [file ppat.1000570.s015.pdf]

**Table S1: Summary of prey and bait hit-rates for HSV-1, mCMV and EBV**

|                            | <b>HSV</b> | <b>mCMV</b> | <b>EBV</b> |
|----------------------------|------------|-------------|------------|
| <b># total preys</b>       | 95         | 284         | 155        |
| <b># interacting preys</b> | 34         | 94          | 38         |
| <b># total baits</b>       | 94         | 283         | 155        |
| <b># interacting baits</b> | 48         | 114         | 54         |
| <b># tested ORFs</b>       | 70         | 173         | 100        |
| <b># interacting ORFs</b>  | 48         | 111         | 61         |
