# Supplementary material for: Evolutionarily Conserved Herpesviral Protein Interaction Networks
Source: PubMed Central journal article supplement (PMC2731838; doi:10.1371/journal.ppat.1000570), 2009-09-04
Supplement: ppat.1000570.s019.pdf [file ppat.1000570.s019.pdf]

**Table S5: Ortholog proteins in five herpesvirus species.**

| HSV-1 | VZV | mCMV  | EBV     | KSHV |
|-------|-----|-------|---------|------|
| UL56  | 0   | -     | -       | -    |
| UL55  | 3   | -     | -       | -    |
| UL42  | 16  | M44   | BMRF1   | 59   |
| UL41  | 17  | -     | -       | -    |
| UL40  | 18  | -     | BaRF1   | 60   |
| UL39  | 19  | M45   | BORF2   | 61   |
| UL38  | 20  | M46   | BORF1   | 62   |
| UL37  | 21  | M47   | BOLF1   | 63   |
| UL36  | 22  | M48   | BPLF1   | 64   |
| UL35  | 23  | M48.2 | BFRF3   | 65   |
| -     | -   | M49   | BFRF2   | 66   |
| UL34  | 24  | M50   | BFRF1   | 67   |
| UL33  | 25  | M51   | BFRF4   | 67.5 |
| UL32  | 26  | M52   | BFLF1   | 68   |
| UL31  | 27  | M53   | BFLF2   | 69   |
| UL30  | 28  | M54   | BALF5   | 9    |
| UL27  | 31  | M55   | BALF4   | 8    |
| UL28  | 30  | M56   | BALF3   | 7    |
| UL29  | 29  | M57   | BALF2   | 6    |
| -     | -   | -     | BMRF2   | 58   |
| UL54  | 4   | M69   | BSLF2   | 57   |
| -     | -   | -     | BMLF1   | -    |
| UL53  | 5   | -     | -       | -    |
| UL52  | 6   | M70   | BSLF1   | 56   |
| UL51  | 7   | M71   | BSRF1   | 55   |
| UL50  | 8   | M72   | BLLF3   | 54   |
| UL49A | 9a  | M73   | BLRF1   | 53   |
| -     | -   | -     | BLRF2   | 52   |
| UL49  | 9   | -     | -       | -    |
| UL48  | 10  | -     | -       | -    |
| UL47  | 11  | -     | -       | -    |
| UL46  | 12  | -     | -       | -    |
| UL44  | 14  | -     | -       | -    |
| UL43  | 15  | -     | -       | -    |
| -     | -   | -     | BZLF1   | K08  |
| -     | -   | -     | BRLF1   | 50   |
| -     | -   | -     | BRRF1   | 49   |
| -     | -   | -     | BRRF2   | 48   |
| UL22  | 37  | M75   | BXLF2   | 22   |
| UL23  | 36  | -     | BXLF1   | 21   |
| UL24  | 35  | M76   | BXRF1   | 20   |
| UL25  | 34  | M77   | BVRF1   | 19   |
| -     | -   | M79   | BVLF1.5 | 18   |
| UL26  | 33  | M80   | BVRF2   | 17   |

| <b>HSV-1</b> | <b>VZV</b> | <b>mCMV</b> | <b>EBV</b> | <b>KSHV</b> |
|--------------|------------|-------------|------------|-------------|
| UL26.5       | 33.5       | M80.5       | BdRF1      | 17.5        |
| -            | -          | -           | LF2        | 11          |
| -            | -          | -           | BDLF3      | 28          |
| -            | -          | -           | BDLF2      | 27          |
| UL18         | 41         | M85         | BDLF1      | 26          |
| UL19         | 40         | M86         | BcLF1      | 25          |
| -            | -          | M87         | BcRF1      | 24          |
| UL20         | 39         | -           | -          | -           |
| UL21         | 38         | M88         | BTRF1      | 23          |
| UL15         | 42         | M89         | BGRF1      | 29a         |
| -            | 45         | -           | BDRF1      | 29b         |
| -            | -          | M91         | BDLF3.5    | 30          |
| -            | -          | M92         | BDLF4      | 31          |
| UL17         | 43         | M93         | BGLF1      | 32          |
| UL16         | 44         | M94         | BGLF2      | 33          |
| UL14         | 46         | M95         | BGLF3      | 34          |
| -            | -          | M96         | BGLF3.5    | 35          |
| UL13         | 47         | M97         | BGLF4      | 36          |
| UL12         | 48         | M98         | BGLF5      | 37          |
| UL11         | 49         | M99         | BBLF1      | 38          |
| UL10         | 50         | M100        | BBRF3      | 39          |
| UL9          | 51         | -           | -          | -           |
| UL8          | 52         | M102        | BBLF2      | 40          |
| -            | -          | -           | BBLF3      | 41          |
| UL7          | 53         | M103        | BBRF2      | 42          |
| UL6          | 54         | M104        | BBRF1      | 43          |
| UL5          | 55         | M105        | BBLF4      | 44          |
| -            | -          | -           | BKRF4      | 45          |
| UL4          | 56         | -           | -          | -           |
| UL3          | 58         | -           | -          | -           |
| UL2          | 59         | M114        | BKRF3      | 46          |
| UL1          | 60         | M115        | BKRF2      | 47          |
| RL2          | 61         | -           | -          | -           |
| RS1          | 62         | -           | -          | -           |
| US1          | 63         | -           | -          | -           |
| US3          | 66         | -           | -          | -           |
| -            | -          | -           | BNRF1      | 75          |
| -            | -          | -           | LMP2A      | K15         |
| -            | -          | -           | LMP2B      | -           |
| US7          | 67         | -           | -          | -           |
| US8          | 68         | -           | -          | -           |
| US9          | 65         | -           | -          | -           |
| US10         | 64         | -           | -          | -           |
