# Supplementary material for: Evolutionarily Conserved Herpesviral Protein Interaction Networks
Source: PubMed Central journal article supplement (PMC2731838; doi:10.1371/journal.ppat.1000570), 2009-09-04
Supplement: ppat.1000570.s025.pdf [file ppat.1000570.s025.pdf]

**Table S11: Analysis of interspecies interactions**

| <b>Bait ID,<br/>VZV</b> | <b>Bait: CORE/ NON-<br/>CORE</b> | <b>Prey</b> | <b>Prey ID</b> | <b>Prey: CORE/ NON-<br/>CORE</b> |
|-------------------------|----------------------------------|-------------|----------------|----------------------------------|
| ORF 19                  | CORE                             | VZV         | ORF 16         | CORE                             |
| ORF 19                  | CORE                             | VZV         | ORF 18         | NON-CORE                         |
| ORF 19                  | CORE                             | VZV         | ORF 19         | CORE                             |
| ORF 19                  | CORE                             | VZV         | ORF 25         | CORE                             |
| ORF 19                  | CORE                             | VZV         | ORF 38         | CORE                             |
| ORF 23                  | CORE                             | VZV         | ORF 25         | CORE                             |
| ORF 23                  | CORE                             | VZV         | ORF 60         | CORE                             |
| ORF 24                  | CORE                             | VZV         | ORF 27         | CORE                             |
| ORF 25                  | CORE                             | VZV         | ORF 25         | CORE                             |
| ORF 25                  | CORE                             | VZV         | ORF 38         | CORE                             |
| ORF 25                  | CORE                             | VZV         | ORF 62         | NON-CORE                         |
| ORF 17                  | NON-CORE                         | VZV         | ORF 42         | CORE                             |
| ORF 36                  | NON-CORE                         | VZV         | ORF 16         | CORE                             |
| ORF 36                  | NON-CORE                         | VZV         | ORF 25         | CORE                             |
| ORF 36                  | NON-CORE                         | VZV         | ORF 36         | NON-CORE                         |
| ORF 51                  | NON-CORE                         | VZV         | ORF 25         | CORE                             |
| ORF 19                  | CORE                             | HSV-1       | UL 40          | NON-CORE                         |
| ORF 19                  | CORE                             | mCMV        | M32            | NON-CORE                         |
| ORF 36                  | NON-CORE                         | mCMV        | M10            | NON-CORE                         |
| ORF 19                  | CORE                             | mCMV        | M51            | CORE                             |
| ORF 19                  | CORE                             | mCMV        | M73            | CORE                             |
| ORF 19                  | CORE                             | mCMV        | M107           | NON-CORE                         |
| ORF 23                  | CORE                             | mCMV        | M87            | NON-CORE                         |
| ORF 25                  | CORE                             | mCMV        | M119.3         | NON-CORE                         |
| ORF 19                  | CORE                             | mCMV        | M134           | NON-CORE                         |
| ORF 19                  | CORE                             | mCMV        | M141           | NON-CORE                         |
| ORF 19                  | CORE                             | mCMV        | M168           | NON-CORE                         |
| ORF 25                  | CORE                             | mCMV        | M163           | NON-CORE                         |
| ORF 19                  | CORE                             | EBV         | BFRF4          | CORE                             |
| ORF 19                  | CORE                             | EBV         | BDLF2          | NON-CORE                         |
| ORF 24                  | CORE                             | EBV         | BCRF2          | NON-CORE                         |
| ORF 19                  | CORE                             | KSHV        | ORF 45         | NON-CORE                         |
| ORF 19                  | CORE                             | KSHV        | K10            | NON-CORE                         |
| ORF 19                  | CORE                             | KSHV        | ORF 62         | CORE                             |
| ORF 51                  | NON-CORE                         | KSHV        | K3             | NON-CORE                         |
| ORF 24                  | CORE                             | KSHV        | ORF 74         | NON-CORE                         |
| ORF 24                  | CORE                             | KSHV        | K3             | NON-CORE                         |
