# Supplementary material for: Evolutionarily Conserved Herpesviral Protein Interaction Networks
Source: PLOS journal article supplement (doi:10.1371/journal.ppat.1000570), 2009-09-03
Supplement: S2 (10.1371/journal.ppat.1000570.s002) [file journal.ppat.1000570.s002]

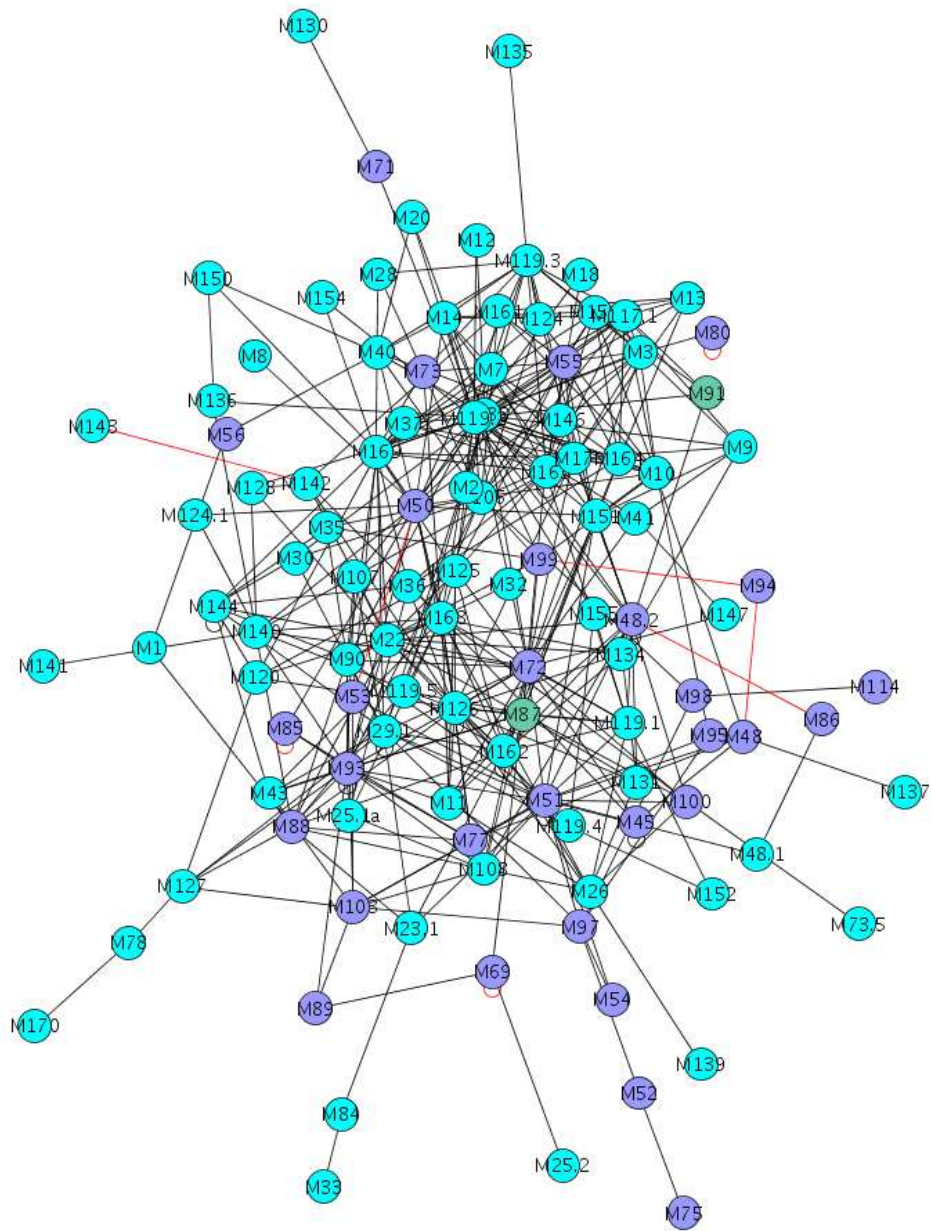

Proteins conserved in:

- All Viruses
- mCMV/EBV/KSHV
- mCMV
