# Supplementary material for: Evolutionarily Conserved Herpesviral Protein Interaction Networks
Source: PLOS journal article supplement (doi:10.1371/journal.ppat.1000570), 2009-09-03
Supplement: S18 (10.1371/journal.ppat.1000570.s018) [file journal.ppat.1000570.s018]

**Table S4: Network parameters in herpesviruses.**

| <b>Network Parameters</b>                                                                     | <b>HSV-1</b> | <b>VZV</b> | <b>mCMV</b> | <b>EBV</b> | <b>KSHV</b> |
|-----------------------------------------------------------------------------------------------|--------------|------------|-------------|------------|-------------|
| <b># Protein</b>                                                                              | 48           | 57         | 111         | 61         | 50          |
| <b># Interactions</b>                                                                         | 111          | 173        | 406         | 218        | 123         |
| <b># Interactions (without self-interactions)</b>                                             | 100          | 160        | 393         | 208        | 115         |
| <b>Average degree</b>                                                                         | 4.63         | 6.07       | 7.32        | 7.15       | 4.92        |
| <b>Average degree (without self-interactions)</b>                                             | 4.17         | 5.61       | 7.08        | 6.82       | 4.60        |
| <b>Power coefficient</b>                                                                      | 0.99         | 0.79       | 0.94        | 0.74       | 0.82        |
| <b>R2</b>                                                                                     | 0.84         | 0.74       | 0.77        | 0.66       | 0.70        |
| <b>Characteristic path length</b>                                                             | 2.79         | 2.34       | 2.84        | 2.44       | 2.84        |
| <b>Diameter</b>                                                                               | 6            | 5          | 7           | 5          | 7           |
| <b>Clustering coefficient</b>                                                                 | 0.25         | 0.39       | 0.24        | 0.40       | 0.15        |
| <b>Enrichment over ER</b>                                                                     | 2.52         | 3.61       | 3.66        | 3.36       | 1.45        |
| <b>Enrichment over ES</b>                                                                     | 0.80         | 1.00       | 1.24        | 1.14       | 0.69        |
| <b>% published interactions (published only for this virus)</b>                               | 8/111=7.2%   | 0/173=0.0% | 4/406=1.0%  | 1/218=0.5% | 4/123=3.3%  |
| <b>% published interactions (published for this virus or homologs in other viruses)</b>       | 9/111=8.1%   | 9/173=5.2% | 8/406=2.0%  | 5/218=2.3% | 7/123=5.7%  |
| <b>% published interactions found (published only for this virus)</b>                         | 8/59=13.6%   | 0/5=0.0%   | 4/20=20.0%  | 1/25=4.0%  | 4/11=36.4%  |
| <b>% published interactions found (published for this virus or homologs in other viruses)</b> | 9/71=12.7%   | 9/67=13.4% | 8/51=15.7%  | 5/58=8.6%  | 7/54=13.0%  |
